# Supplementary material for: Eicosapentaenoic and docosahexaenoic acid-enriched high fat diet delays the development of fatty liver in mice
Source: PubMed Central journal article supplement (PMC4509768; doi:10.1186/s12944-015-0072-8), 2015-07-22

Figure S1

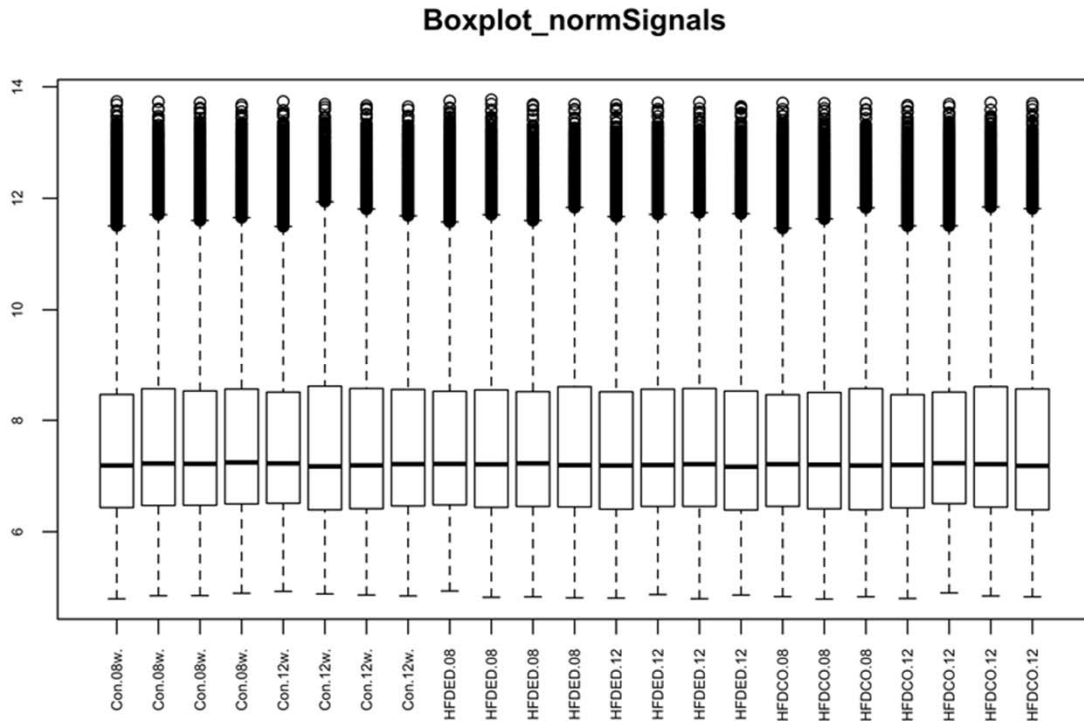

Figure S2

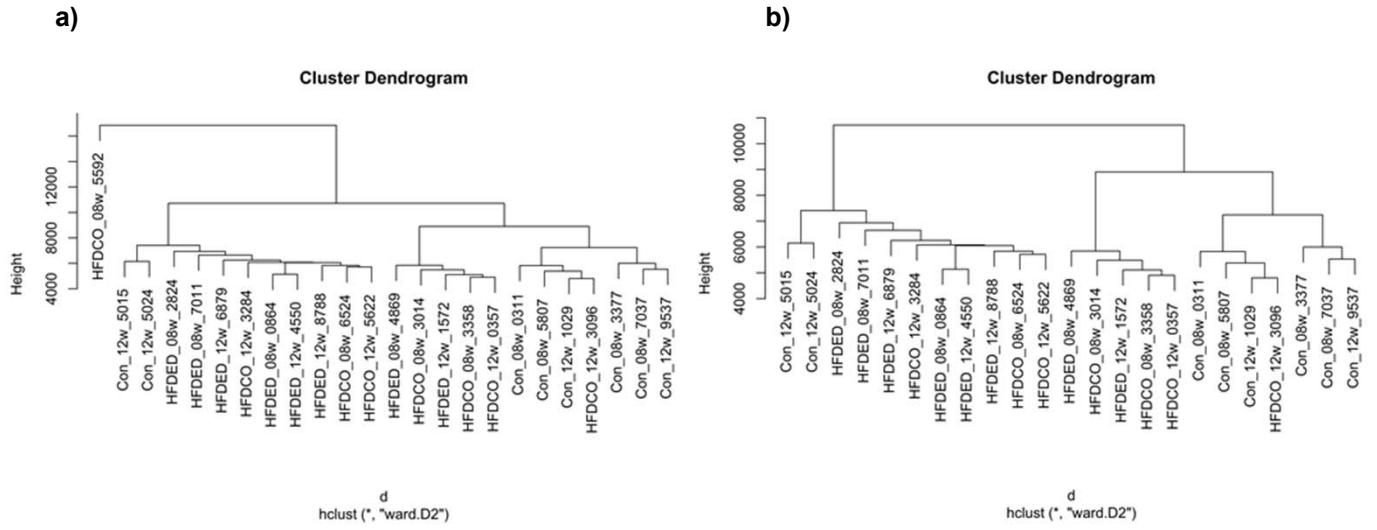

Figure S3

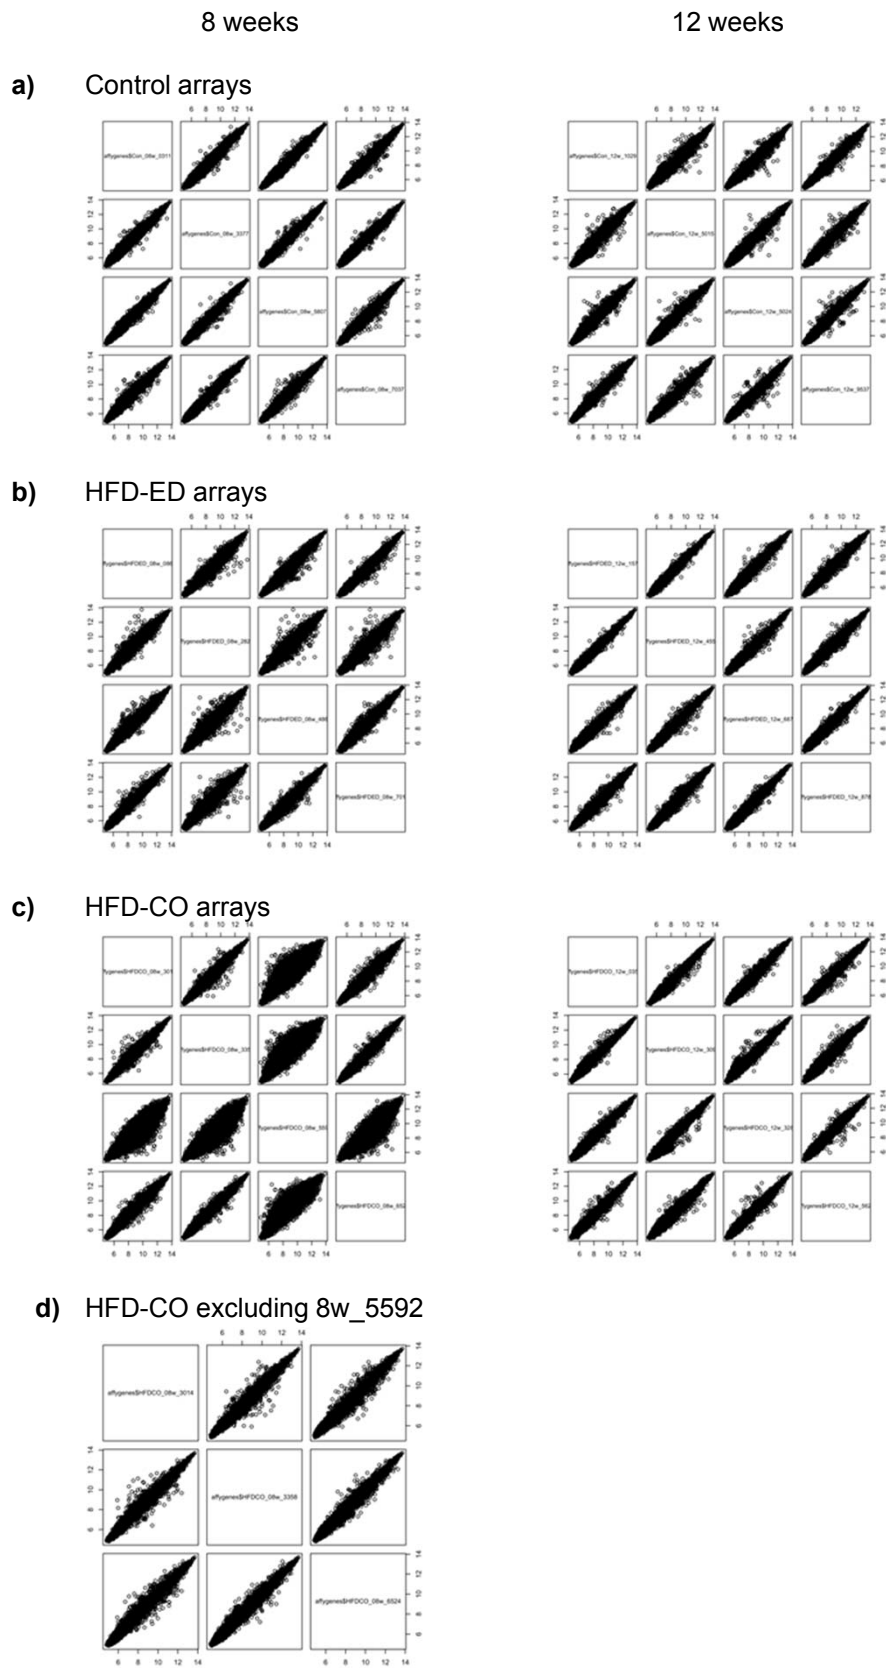





Figure S5

a) 8 weeks

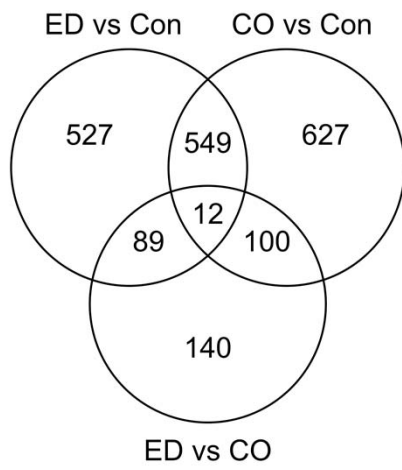

b) 12 weeks

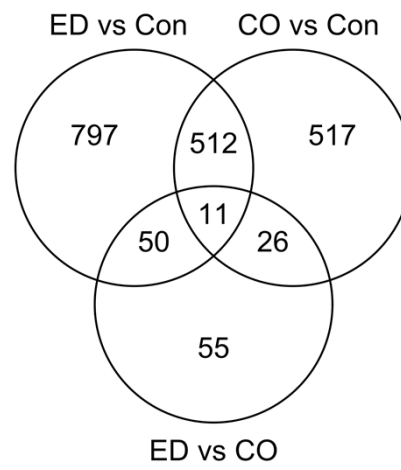

Figure S6

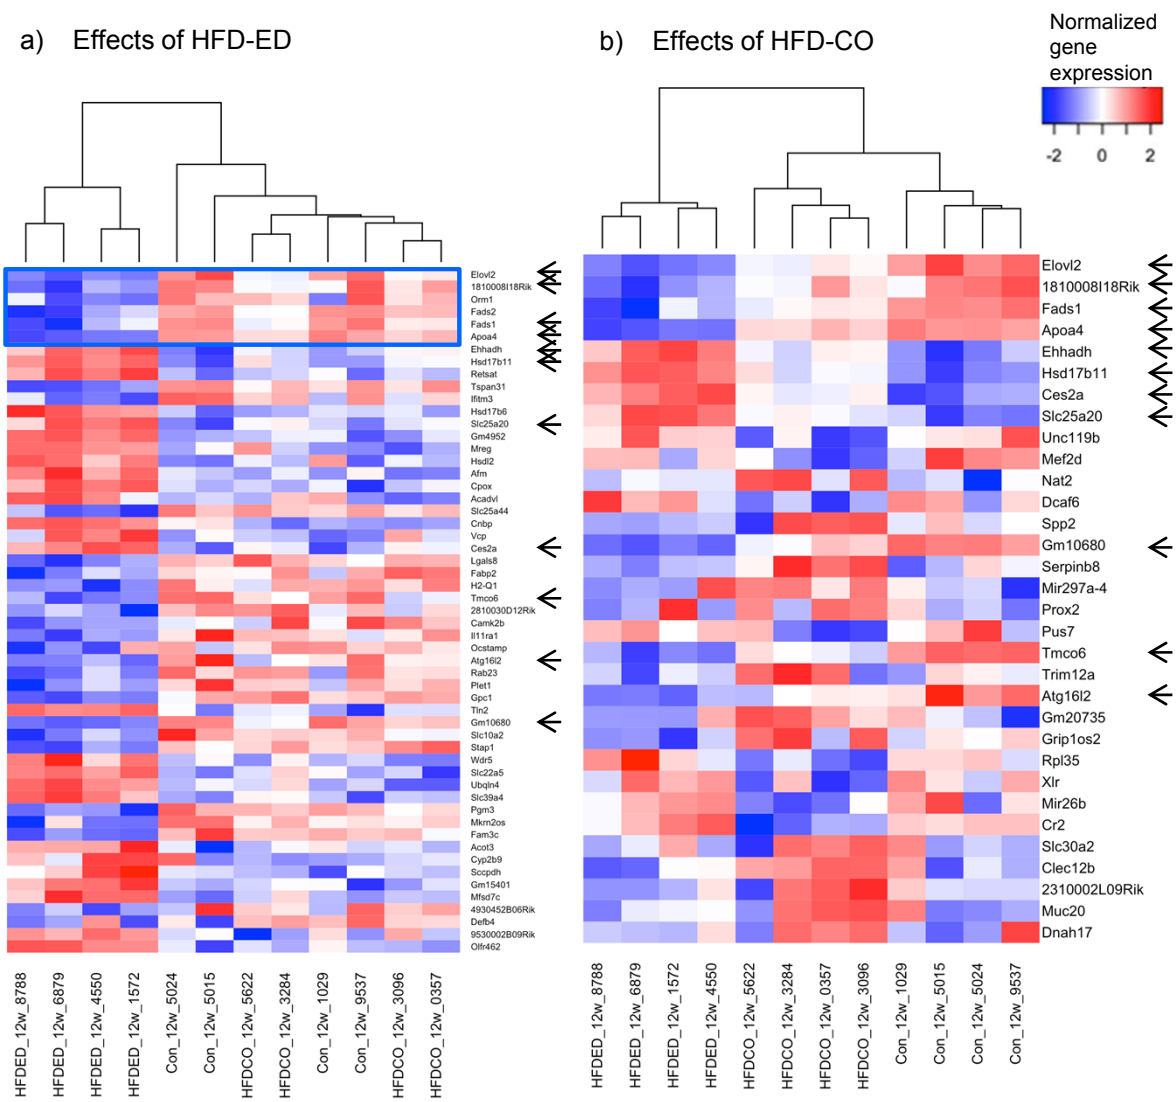

Supplement: 12944_2015_72_MOESM1_ESM.pdf [file 12944_2015_72_MOESM1_ESM.pdf]
